# Supplementary material for: Clinical findings in patellofemoral osteoarthritis compared to individually-matched controls: a pilot study
Source: PubMed Central journal article supplement (PMC8323464; doi:10.1136/bmjsem-2020-000877), 2020-12-09
Supplement: bmjsem-2020-000877supp001.pdf [file bmjsem-2020-000877supp001.pdf]

**Supplementary Table 1: Description of all clinical tests**

| Test                                        | Protocol description                                                                                                                                                                                                                                                                                                                                                                                                                                                                                                                                                                                                                                                                 |
|---------------------------------------------|--------------------------------------------------------------------------------------------------------------------------------------------------------------------------------------------------------------------------------------------------------------------------------------------------------------------------------------------------------------------------------------------------------------------------------------------------------------------------------------------------------------------------------------------------------------------------------------------------------------------------------------------------------------------------------------|
| <b>Tibiofemoral frontal plane alignment</b> | <ul style="list-style-type: none"> <li>• Palpate &amp; mark tibial tuberosity &amp; midpoint over the talus neck</li> <li>• Ask participant to stand on footprint map with foot at 10° external rotation, feet shoulder width, looking forward, 50% weightbearing</li> <li>• Place callipers of inclinometer in alignment with the the two landmarks</li> <li>• Record varus/valgus direction in degrees</li> </ul>                                                                                                                                                                                                                                                                  |
| <b>Herrington test</b>                      | <ul style="list-style-type: none"> <li>• Participant supine on plinth, knee positioned and supported in 20° of knee flexion (to place the patella within the trochlea groove)</li> <li>• With knee in position, place a piece of 1” Leukotape (or similar) across the knee joint, and mark the medial and lateral epicondyles of the femur and mid-point of the patella. Be sure to make note of medial and lateral end of tape</li> <li>• Repeat 3 times, attaching tape to this document for measuring later</li> </ul>                                                                                                                                                            |
| <b>30 second chair stand test</b>           | <ul style="list-style-type: none"> <li>• <b>Shoes on</b>, middle of chair, feet ~ shoulder width apart and slightly behind knees with feet flat on floor, arms crossed on chest</li> <li>• Instructions “<i>stand up keeping arms across chest, and ensure you stand completely up so hips and knees are fully extended; then sit completely back down, so that the bottom fully touches the seat, as many times as possible in 30 seconds,</i>”</li> <li>• 1-2 practice repetitions for technique</li> <li>• One 30-second test trial</li> <li>• Record number of correctly performed full stands (if more than ½ of way up at end of the test, counted as a full stand)</li> </ul> |
| <b>Repetitive single leg rise test</b>      | <ul style="list-style-type: none"> <li>• <b>Shoes on</b>, seated on edge of plinth, foot placed with heel 10 cm forward from a plumb line at edge of plinth, other leg held at side of body, arms across chest.</li> <li>• Height of plinth adjusted so knee angle is 90°</li> <li>• Instructions: “<i>keep back of heel on marker, stand as many times as possible on one leg keeping arms across chest, in time with the <b>metronome (45bpm)</b>. If you get to 50 we will stop. Control yourself on the descent</i>”</li> <li>• 2-3 practice tests</li> </ul>                                                                                                                    |

|                                                 |                                                                                                                                                                                                                                                                                                                                                                                                                                                                                                                                                                   |
|-------------------------------------------------|-------------------------------------------------------------------------------------------------------------------------------------------------------------------------------------------------------------------------------------------------------------------------------------------------------------------------------------------------------------------------------------------------------------------------------------------------------------------------------------------------------------------------------------------------------------------|
|                                                 | <ul style="list-style-type: none"> <li>• If nonweightbearing leg touches ground, do not count that rise; if touches ground 3 times during test, record number of rises to that point only and stop test</li> </ul>                                                                                                                                                                                                                                                                                                                                                |
| <b>Timed 12 stair climb</b>                     | <ul style="list-style-type: none"> <li>• Participant wears usual footwear</li> <li>• Instructions “<i>climb up then down the 2 small flights of stairs as quickly as possible but safely</i>”</li> <li>• 1-2 practice trials for technique and to confirm safety</li> <li>• Trial: record time to ascend and descend 12 steps - up 2 flights of 6 steps then descend</li> <li>• (both feet touch down at bottom of landing to end timer)</li> <li>• No use of hand-rails or gait aids</li> <li>• Height of step: 18 cm</li> <li>• Depth of step: 32 cm</li> </ul> |
| <b>Ankle dorsiflexion range of motion (ROM)</b> | <ul style="list-style-type: none"> <li>• Participant stands in front of a wall with horizontal line bisecting calcaneus and second toe</li> <li>• Participant instructed to lunge forward to touch knee to wall</li> <li>• Move foot back gradually until can just touch wall while maintaining heel on floor</li> <li>• Measure distance between tip of great toe and wall</li> <li>• Measure shank length from lateral knee joint line to lateral malleolus</li> </ul>                                                                                          |
| <b>Knee hyperextension ROM</b>                  | <ul style="list-style-type: none"> <li>• Participant supine on plinth, towel under Achilles tendon</li> <li>• Measure ROM using 12” goniometer – axis over lateral epicondyle of femur; stationary arm towards greater trochanter; movable arm toward lateral malleolus</li> </ul>                                                                                                                                                                                                                                                                                |
| <b>Knee flexion ROM</b>                         | <ul style="list-style-type: none"> <li>• Participant supine on plinth, slides heel towards buttocks without lifting heel off plinth</li> <li>• Measure ROM using 12” goniometer – axis over lateral epicondyle of femur; stationary arm towards greater trochanter; movable arm toward lateral malleolus</li> </ul>                                                                                                                                                                                                                                               |
| <b>Hip extension ROM</b>                        | <ul style="list-style-type: none"> <li>• Participant prone, feet off end of plinth, chin resting on hands</li> <li>• Belt across pelvis</li> <li>• Measure ROM using 12” goniometer – axis over greater trochanter; stationary arm parallel to mid-axillary line of trunk; movable arm toward lateral epicondyle of femur</li> <li>• Knee maintained in extension</li> </ul>                                                                                                                                                                                      |
| <b>Hip flexion ROM</b>                          | <ul style="list-style-type: none"> <li>• Participant supine on plinth, bends knee and draws knee towards chest without using hands</li> <li>• Measure ROM using 12” goniometer – axis over greater trochanter; stationary arm parallel to mid-axillary line of trunk; movable arm toward lateral epicondyle of femur</li> </ul>                                                                                                                                                                                                                                   |
| <b>Hip internal rotation ROM</b>                | <ul style="list-style-type: none"> <li>• Participant prone on plinth, test leg in 90° knee flexion</li> <li>• Belt across pelvis</li> </ul>                                                                                                                                                                                                                                                                                                                                                                                                                       |

|                                                              |                                                                                                                                                                                                                                                                                                                                                                                                                                                                                                                                                                                                                                                                                                                                                                                |
|--------------------------------------------------------------|--------------------------------------------------------------------------------------------------------------------------------------------------------------------------------------------------------------------------------------------------------------------------------------------------------------------------------------------------------------------------------------------------------------------------------------------------------------------------------------------------------------------------------------------------------------------------------------------------------------------------------------------------------------------------------------------------------------------------------------------------------------------------------|
|                                                              | <ul style="list-style-type: none"> <li>• Inclinomometer held to outside of shin 5 cm proximal to lateral malleolus, starting angle is 0°.</li> <li>• Instructions: <i>“let leg drop out to side as far as possible”</i></li> <li>• Record angle without overpressure</li> </ul>                                                                                                                                                                                                                                                                                                                                                                                                                                                                                                |
| <b>Hip external rotation ROM</b>                             | <ul style="list-style-type: none"> <li>• Participant prone on plinth, test leg in 90° knee flexion, non-test leg in slight abduction for clearance</li> <li>• Belt across pelvis</li> <li>• Inclinomometer held to inside of shin 5 cm proximal to medial malleolus, starting angle is 0°.</li> <li>• Instructions: <i>“let leg drop in to centre as far as possible”</i></li> <li>• Record angle without overpressure</li> </ul>                                                                                                                                                                                                                                                                                                                                              |
| <b>Isokinetic knee extension / flexion strength (Biodex)</b> | <ul style="list-style-type: none"> <li>• Participant seated in Biodex, back rest at 70-85°</li> <li>• Two speeds: 60° and 180° per second</li> <li>• 1-2 sub-maximal practice trials (~50% effort)</li> <li>• One max test trial at each speed, 5 repetitions</li> <li>• ≥ 30 second rest between each test series</li> <li>• Verbal encouragement <i>“Go! Harder!”</i></li> <li>• If &gt; 15% coefficient of variance, repeat test</li> </ul>                                                                                                                                                                                                                                                                                                                                 |
| <b>Hip abduction strength</b>                                | <ul style="list-style-type: none"> <li>• Isometric ‘make’ test, 3-5 second hold</li> <li>• Participant supine, belt across contra-lateral thigh</li> <li>• Index leg resting in hip neutral (0°)</li> <li>• Force plate of handheld dynamometer positioned 5 cm above lateral malleolus</li> <li>• Instructions <i>“keep arms folded, heel on the bed and push leg out to side against force plate as hard as possible”</i></li> <li>• 1-2 sub-maximal practice trials</li> <li>• Verbal encouragement <i>“Go! Go! Go!”</i></li> <li>• ≥ 5 second rest between each repetition</li> <li>• If &gt; 10% variability, additional trial is performed</li> <li>• Measure lever arm length: greater trochanter to dynamometer marker (5 cm proximal to lateral malleolus)</li> </ul> |
| <b>Hip extension strength</b>                                | <ul style="list-style-type: none"> <li>• Isometric ‘make’ test, 3-5 second hold</li> <li>• Positioned in prone, belt across contra-lateral thigh, chin resting on hands, feet off the end of the bed</li> <li>• Index leg at 90° knee flexion</li> <li>• Force plate over centre of participant’s heel</li> <li>• Instructions <i>“push foot straight up to ceiling”</i></li> </ul>                                                                                                                                                                                                                                                                                                                                                                                            |

|                                       |                                                                                                                                                                                                                                                                                                                                                                                                                                                                                                                                                                                                                                                                                                                                                                                     |
|---------------------------------------|-------------------------------------------------------------------------------------------------------------------------------------------------------------------------------------------------------------------------------------------------------------------------------------------------------------------------------------------------------------------------------------------------------------------------------------------------------------------------------------------------------------------------------------------------------------------------------------------------------------------------------------------------------------------------------------------------------------------------------------------------------------------------------------|
|                                       | <ul style="list-style-type: none"> <li>• Therapist matches force once knee leaves surface of plinth.</li> <li>• 1-2 sub-maximal practice trials</li> <li>• Verbal encouragement “Go! Go! Go!”</li> <li>• <math>\geq 5</math> second rest between each repetition</li> <li>• If <math>&gt; 10\%</math> variability, additional trial is performed</li> <li>• Measure lever arm length: inferior greater trochanter to lateral knee joint line</li> </ul>                                                                                                                                                                                                                                                                                                                             |
| <b>Hip internal rotation strength</b> | <ul style="list-style-type: none"> <li>• Isometric ‘make’ test, 3-5 second hold</li> <li>• Positioned in prone, belt across contra-lateral thigh, index leg resting in hip neutral (<math>0^\circ</math>), knee at <math>90^\circ</math></li> <li>• Force plate positioned 5 cm above lateral malleolus</li> <li>• Instructions “<i>turn shin outwards as hard as possible, keeping both knees together</i>”</li> <li>• 1-2 sub-maximal practice trials</li> <li>• Verbal encouragement “Go! Go! Go!”</li> <li>• <math>\geq 5</math> second rest between each repetition</li> <li>• If <math>&gt; 10\%</math> variability, additional trial is performed</li> <li>• Measure lever arm length: knee joint line to dynamometer marker (5 cm proximal to lateral malleolus)</li> </ul> |
| <b>Hip external rotation strength</b> | <ul style="list-style-type: none"> <li>• Isometric ‘make’ test, 3-5 second hold</li> <li>• Positioned in prone, belt across contra-lateral thigh, index leg resting in hip neutral (<math>0^\circ</math>), knee at <math>90^\circ</math></li> <li>• Force plate 5 cm proximal to medial malleolus</li> <li>• Instructions “<i>turn shin inwards towards the centre as hard as possible</i>”</li> <li>• 1-2 sub-maximal practice trials</li> <li>• Verbal encouragement “Go! Go! Go!”</li> <li>• <math>\geq 5</math> second rest between each repetition</li> <li>• If <math>&gt; 10\%</math> variability, additional trial is performed</li> <li>• Measure lever arm length: knee joint line to dynamometer marker (5 cm proximal to medial malleolus)</li> </ul>                   |
| <b>Single leg squats</b>              | <ul style="list-style-type: none"> <li>• Video camera 3 metres from participant, at height of lowest tripod setting (<math>\sim 65</math> cm)</li> <li>• Adjust height of plinth behind participant to provide squat depth target to <math>45^\circ</math> knee flexion, using 12” goniometer</li> <li>• Place reflective markers: midpoint of femoral condyles, bilateral ASIS, proximal thigh along line from ASIS to knee marker, midpoint of ankle malleoli, manubrium</li> <li>• Participant stands, <b>shoes off</b>, on foot map with arms across chest</li> <li>• free leg held in front of squat leg</li> </ul>                                                                                                                                                            |

- |  |                                                                                                                                                                                                                                                                                                                                                                                                                                                                                         |
|--|-----------------------------------------------------------------------------------------------------------------------------------------------------------------------------------------------------------------------------------------------------------------------------------------------------------------------------------------------------------------------------------------------------------------------------------------------------------------------------------------|
|  | <ul style="list-style-type: none"><li>• metronome 60 bpm, 2 ‘ticks’ each direction</li><li>• single leg squat to 45° knee flexion (plinth behind participant – buttock touch plinth as target to reproduce angle)</li><li>• 2-3 practice trials</li><li>• Repeat 5 times</li><li>• On test completion, participants were asked “<i>How easy was it to perform the task?</i>”. Response options were on a 5-point Likert scale ranging from ‘markedly easy’ to ‘markedly hard’</li></ul> |
|--|-----------------------------------------------------------------------------------------------------------------------------------------------------------------------------------------------------------------------------------------------------------------------------------------------------------------------------------------------------------------------------------------------------------------------------------------------------------------------------------------|

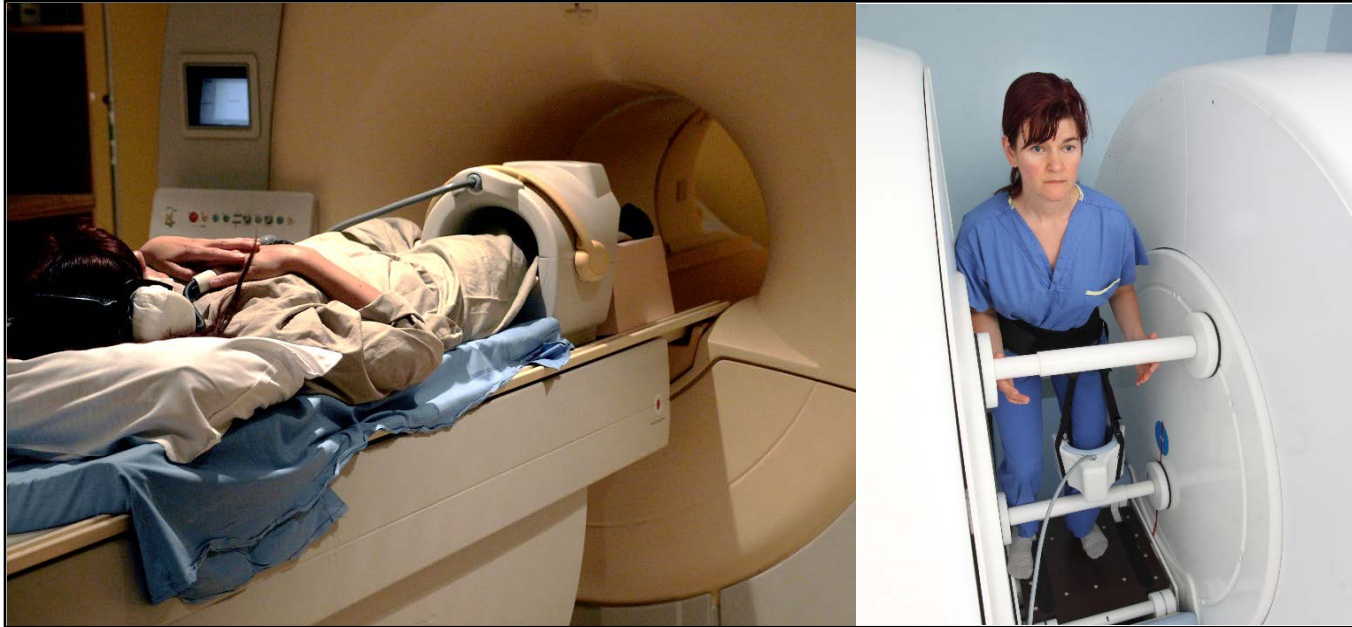

**Supplementary Figure 1:** Participants were positioned in supine for 2D (left) and upright for 3D (right) alignment measures. Note image on right shows standing two-legged, but in the present study participants stood on one leg only. *Right-hand image from Journal of Magnetic Resonance Imaging, Macri EM et al., “Patellofemoral and tibiofemoral alignment in a fully weight-bearing upright MR: Implementation and repeatability” Published Online First: Doi:10.1002/jmri.25823, 2017, with permission from John Wiley and Sons.*

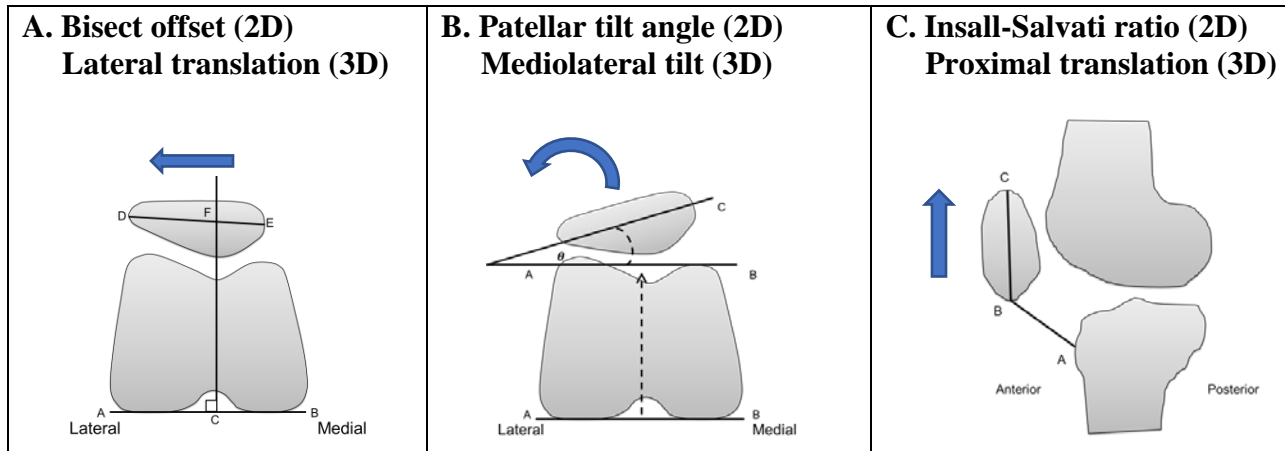

**Supplementary Figure 2: Description of alignment measures**

**A.** 2D bisect offset is the percentage (%) of the widest line across the patella that lies lateral to a line bisecting the deepest part of the trochlea (arrow indicates direction of 3D lateral translation of patella relative to femur, in mm). **B.** 2D patellar tilt angle: Angle ( $\theta$ ) between posterior condylar line and line across widest part of patella (arrow indicates direction of 3D lateral tilt of patella relative to femur, in degrees). **C.** 2D Insall-Salvati Ratio is the ratio of patella tendon length to the patellar height (arrow indicates direction of 3D proximal translation of patella relative to femur, in mm)
